# Supplementary material
Source: PubMed Central journal article supplement (PMC10425825)
Supplement: jamaneurol-e231408-s001.pdf [file jamaneurol-e231408-s001.pdf]

1  
2 **Study protocol: Benign peripheral paroxysmal positional vertigo (BPPV): Comparison of**  
3 **the Epley maneuver with the so-called SémontPLUS liberation maneuver.**

4  
5  
6 **Basis and rationale of the study and theoretical background**  
7

8 BPPV is the second most common form of vertigo. Reported prevalence ranges from 10 to  
9 140 per 100,000 and lifetime prevalence is at least 2.4% (1, 2); prevalence of 9-11% have  
10 been found in a population older than 75 years (3, 4).

11  
12 The leading symptom is recurrent attacks of spinning vertigo, each triggered by changes in  
13 position relative to gravity and lasting from seconds to one minute. The cause is usually freely  
14 moving otoconia in the posterior arcuate canal (so-called canalolithiasis); the horizontal  
15 arcuate canal is affected much less frequently. In 70% of patients there is a spontaneous  
16 remission within days. In case of persistence, about 95% of patients can be successfully  
17 treated with so-called freeing maneuvers, e.g., the Sémont maneuver. However, this often  
18 requires 20 to 30 maneuvers over several days (overview in (6)).

19  
20 Based on

21  
22 a) our own biophysical studies, which we performed together with colleagues from  
23 Switzerland on a mechanical model of positional vertigo (7) and which show that theoretically  
24 the effectiveness of the Sémont maneuvers can be increased by changing the positional angle  
25 by 30° in the so-called step two of the positional maneuvers, as well as

26  
27 b) an analysis of the comparison of the conventional Sémont maneuver with the so-called  
28 SémontPLUS maneuver (477/17), which shows that the mean time to freedom from  
29 symptoms for the Sémont maneuver is 3.9 days and only 2.3 days for the SémontPLUS  
30 maneuver ( $p < 0.05$ ), the efficacy of the Epley maneuver will be compared with the  
31 SémontPLUS maneuver in a parallel group design.

32  
33 The primary endpoint is the duration, i.e., days ("mornings") until freedom from  
34 symptoms with continuation of the two maneuvers in the following days, three times in the  
35 morning, at noon and in the evening. This is assessed by the patient's statements that he/she  
36 can still induce rotational vertigo or not during the positioning maneuvers to the affected side  
37 performed by him/herself.

38  
39  
40  
41  
42  
43  
44  
45  
46  
47  
48  
49  
50

51  
52  
53  
54  
55  
56  
57  
58  
59  
60  
61  
62  
63  
64  
65  
66  
67  
68  
69  
70  
71  
72  
73  
74  
75  
76  
77  
78  
79  
80  
81  
82  
83  
84  
85  
86  
87  
88  
89  
90  
91  
92  
93  
94  
95  
96  
97  
98  
99  
100  
101  
102  
103  
104  
105  
106  
107  
108  
109  
110

## Reference List

- (1) von-Brevern M, Radtke A, Lezius F, et al. Epidemiology of benign paroxysmal positional vertigo: a population based study. *J Neurol Neurosurg Psychiatry* 2007 Jul;78:710-715.
- (2) van der Zaag-Loonen HJ, van Leeuwen RB, Bruintjes TD, van Munster BC. Prevalence of unrecognized benign paroxysmal positional vertigo in older patients. *Eur Arch Otorhinolaryngol* 2015 Jun;272:1521-1524.
- (3) Oghalai JS, Manolidis S, Barth JL, Stewart MG, Jenkins HA. Unrecognized benign paroxysmal positional vertigo in elderly patients. *Otolaryngol Head Neck Surg* 2000 May;122:630-634.
- (4) Kollen L, Frandin K, Moller M, Fagevik OM, Moller C. Benign paroxysmal positional vertigo is a common cause of dizziness and unsteadiness in a large population of 75-year-olds. *Aging Clin Exp Res* 2012 Aug;24:317-323.
- (5) Neuhauser HK. The epidemiology of dizziness and vertigo. *Handb Clin Neurol* 2016;137:67-82.
- (6) Bhattacharyya N, Gubbels SP, Schwartz SR, et al. Clinical Practice Guideline: Benign paroxysmal positional vertigo (update). *Otolaryngol Head Neck Surg* 2017 Mar;156:S1-S47.
- (7) Obrist D, Nienhaus A, Zamaro E, Kalla R, Mantokoudis G, Strupp M. Determinants for a Successful Semont Maneuver: An In vitro Study with a Semicircular Canal Model. *Front Neurol* 2016;7:150.
- (8) Von Brevern M, Bertholon P, Brandt T, et al. Benign paroxysmal positional vertigo: Diagnostic criteria. *J Vestib Res* 2015;25:105-117.
- (9) Epley JM. The canalith repositioning procedure: for treatment of benign paroxysmal positional vertigo. *Otolaryngol Head Neck Surg* 1992 Sep;107:399-404.
- (10) Brandt T, Steddin S, Daroff RB. Therapy for benign paroxysmal positioning vertigo, revisited. *Neurology* 1994;44:796-800.
- (11) Kim JS, Oh SY, Lee SH, et al. Randomized clinical trial for geotropic horizontal canal benign paroxysmal positional vertigo. *Neurology* 2012 Aug 14;79:700-707.
- (12) Kim JS, Oh SY, Lee SH, et al. Randomized clinical trial for apogeotropic horizontal canal benign paroxysmal positional vertigo. *Neurology* 2012 Jan 17;78:159-166.

111  
112  
113  
114  
115  
116  
117  
118  
119  
120  
121  
122  
123  
124  
125  
126  
127  
128  
129  
130  
131  
132  
133  
134  
135  
136  
137  
138  
139  
140  
141  
142  
143  
144  
145  
146  
147  
148  
149  
150  
151  
152  
153  
154  
155  
156  
157  
158  
159  
160  
161  
162  
163  
164  
165  
166  
167  
168  
169  
170  
171

## **Study design**

### **1. Diagnostic examinations**

Patients who present to our outpatient clinic or to one of our wards for vertigo anyway will undergo routine history taking and clinical neurological, neuro-otological and neuro-ophthalmological examination. No diagnostic measures beyond these are required for this study.

### **2. Inclusion criteria**

Subject ( $\geq 18$  years of age) meets diagnostic criteria for the current presence of BPPV of a posterior arcuate duct (8):

History: rotary vertigo attacks triggered by head or body position change. Duration: < 1 minute, associated with nausea, vomiting, oscillopsia

Findings: When positioned to the affected ear: torsional and vertically to the forehead beating, exhaustive nystagmus with crescendo-decrescendo-like course.

### **3. Exclusion Criteria:**

- a) Subjects not capable of giving consent
- b) Respondent does not want therapy for BPPV

### **4. Recruitment procedure**

The recruitment of subjects takes place

- in Munich

a) in the outpatient clinic of Prof. M. Strupp in the Neurological Clinic and Polyclinic

b) in the outpatient clinic of the German Dizziness Center and

c) on the neurological wards

- in Italy in Siena

- in Belgium in Bruges.

Eligible subjects with positive inclusion criteria as well as missing exclusion criteria will be selected.

### **5. Course of studies**

- a) Patients present to our clinic for vertigo as part of routine care.

172  
173  
174  
175  
176  
177  
178  
179  
180  
181  
182  
183  
184  
185  
186  
187  
188  
189  
190  
191  
192  
193  
194  
195  
196  
197  
198  
199  
200  
201  
202  
203  
204  
205  
206  
207  
208  
209  
210  
211  
212  
213  
214  
215  
216  
217  
218  
219  
220  
221  
222  
223  
224  
225

- b) Routine history taking, physical examination and standardized apparatus diagnostics by means of so-called neuro-orthoptic diagnostics (oculomotor and nystagmus, Halmagyi head impulse test, eye rolling, subjective visual vertical) and caloric testing are performed.
- c) Diagnostic positioning maneuvers are used to make the diagnosis of BPPV of a posterior arch.
- d) Patient is informed about the study.
- e) Patient consents
- f) Randomization (1:1). Randomization alternates between Epley and SémontPLUS and is documented in a list kept at the participating center with consecutive number, maneuver, name and date of birth of the patient. Only number and maneuver are to be passed on for evaluation.
- g) One-time performance of the Epley (figure) release maneuver or the SémontPLUS maneuver. The angle of the head inclination is measured by means of an app ("compass"), which can also be used as a so-called inclinometer, so that standardized examination conditions are ensured. SémontPLUS means 50 degrees beyond the earth's horizontal.
- h) Diagnostic maneuver to check the effect of therapy, i.e., is positional vertigo and/or positional nystagmus still present (*secondary* endpoint).
- i) Depending on randomization, the subject will then perform the Epley (Figure) or SémontPLUS maneuver three times in the morning, three times at noon, and three times in the evening (this frequency is also recommended elsewhere) independently according to prior instructions. He will document on a form after the first maneuver of each day whether positional vertigo was induced (*primary* endpoint). If the subject is unable or unwilling to perform these independently, they may be performed under the guidance of a physician or physical therapist.
- j) A routine follow-up, which is also recommended in the current guidelines anyway (6), is planned after two to four weeks to check the therapy effect.

226  
227  
228  
229  
230  
231  
232  
233  
234  
235  
236  
237  
238  
239  
240  
241  
242  
243  
244  
245  
246  
247  
248  
249  
250  
251  
252  
253  
254  
255  
256  
257  
258  
259  
260  
261  
262  
263

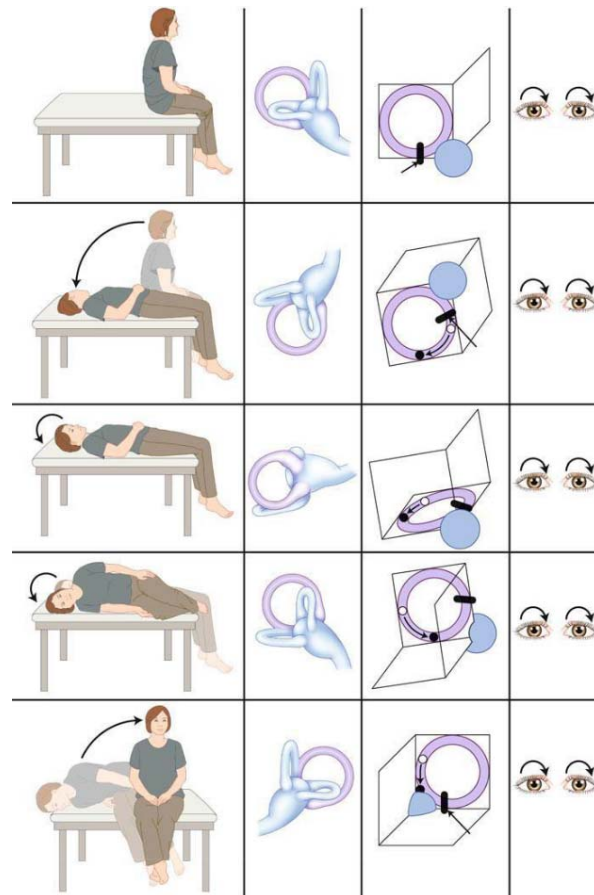

264 **Figure.** Schematic representation of the modified Epley repositioning maneuver (9) in a patient with  
 265 left BPPV. **1** In the seated starting position, the head is rotated 45° toward the affected (left) ear. **2** The  
 266 head and upper body are tilted backward to a slight head hanging position. This triggers movement of  
 267 the heavy particles in the canal, with ampullofugal cupular deflection of the BPPV attack. The patient  
 268 remains in this position for approximately 1 minute. **3a** The head is now rotated 90° toward the  
 269 unaffected ("healthy") ear. **3b** The head and upper body are rotated another 90° to the right in the  
 270 same direction, causing the particles to move toward the exit of the posterior arcuate duct. This  
 271 position is maintained for approximately 1 minute. A positional nystagmus to the affected overlying  
 272 ear during positioning steps 3a and 3b indicates that therapy was successful. **4** The patient is raised  
 273 back to a sitting position (modified according to (10)).  
 274  
275

276 **6. Criteria for individual dropout**  
277

278 Criteria for individual dropout are  
279

- 280 a) Withdrawal of consent
- 281
- 282 b) Refusal of diagnostic or therapeutic measures (see above).
- 283

284  
285 **7. Criteria for discontinuation of the study**  
286

287 Because these are routine diagnostic and therapeutic procedures, criteria for study  
288 discontinuation are not apparent.

289  
290  
291  
292  
293  
294

295  
296  
297  
298  
299  
300  
301  
302  
303  
304  
305  
306  
307  
308  
309  
310  
311  
312  
313  
314  
315  
316  
317  
318  
319  
320  
321  
322  
323  
324  
325  
326  
327  
328  
329  
330  
331  
332  
333  
334  
335  
336  
337  
338  
339  
340  
341  
342  
343  
344  
345  
346  
347

## **8. Endpoints**

**Primary endpoint.** Number of days up to which no positional vertigo was triggered during the 1 maneuver of the day ("morning maneuver"). To be considered a success, no positional vertigo must be triggered on three consecutive days during the "morning maneuver".

**Secondary endpoint.** Success of the freeing maneuver in diagnostic maneuver performed immediately afterwards. If no torsional vertigo AND no nystagmus can be triggered in the latter, the extrication maneuver is rated as primarily successful. If torsional vertigo OR nystagmus OR both can be triggered, it is rated as primarily unsuccessful.

## **Statistical analysis**

Kaplan-Meier curves stratified by maneuver are generated for the primary endpoint. Depending on the curve shape, the strata are compared with an appropriate statistical test. The secondary endpoint will be analysed in a four-field table (maneuver vs. primary outcome) using Chi<sup>2</sup> test.

## **Case Count Estimate**

In other studies of BPPV therapy, between 100 and 200 patients were studied (11, 12). To demonstrate an improvement from 50% to 70% success rate (simplified primary endpoint for case number estimation) with 80% power at a two-sided test level of alpha = 0.05, one needs 93 in each group, for a total of 186 analysable patients. In our planned study, a total of 200 should be included to compensate for failures at follow-up (loss-to-follow-up, noncompleted forms). Due to the high prevalence and the short observation period, within 24 months these patients can be included and the results analysed.

## **Duration of study**

The recruitment period begins with a positive evaluation by the ethics committee and lasts 24 months.
