# Supplementary material
Source: PubMed Central journal article supplement (PMC10425825)
Supplement: jamaneurol-e231408-s002.pdf [file jamaneurol-e231408-s002.pdf]

## Data Sharing Statement

Strupp. The Semont-Plus Maneuver or the Epley Maneuver in Posterior Canal Benign Paroxysmal Positional Vertigo. *JAMA Neurol.* Published June 26, 2023.

doi:10.1001/jamaneurol.2023.1408

### Data

**Data available:** Yes

**Data types:** Deidentified participant data

**How to access data:** [Michael.Strupp@med.uni-muenchen.de](mailto:Michael.Strupp@med.uni-muenchen.de)

**When available:** With publication

### Supporting Documents

**Document types:** Statistical/analytic code, Informed consent form

**How to access documents:** [Michael.Strupp@med.uni-muenchen.de](mailto:Michael.Strupp@med.uni-muenchen.de)

**When available:** With publication

### Additional Information

**Who can access the data:** researchers whose proposed use of the data has been approved

**Types of analyses:** for any purpose

**Mechanisms of data availability:** after approval of a proposal
